# Supplementary material for: SARS-CoV-2 Inhibition by Sulfonated Compounds
Source: PubMed Central journal article supplement (PMC7760145; doi:10.3390/microorganisms8121894), 2020-11-30
Supplement: microorganisms-08-01894-s001.pdf [file microorganisms-08-01894-s001.pdf]

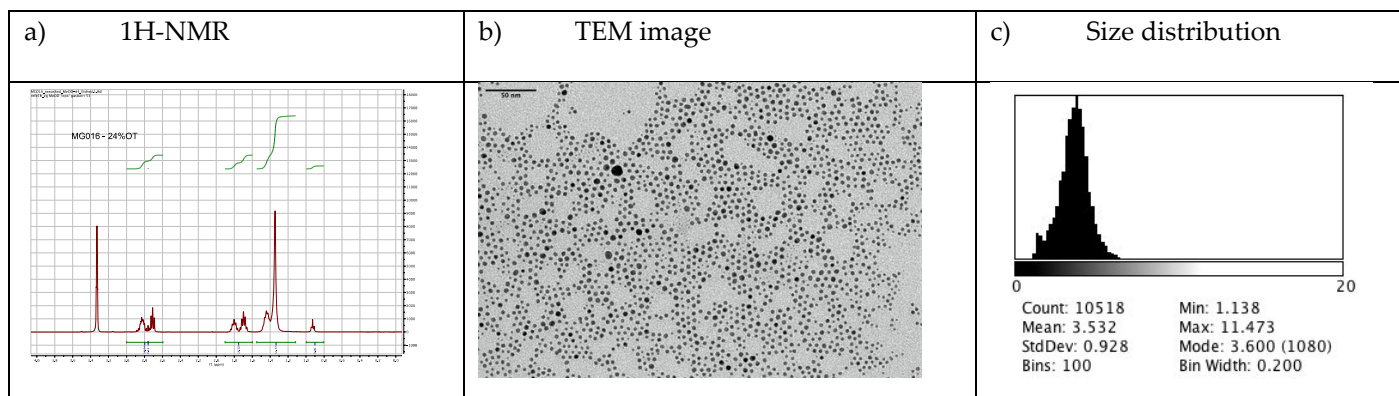

Figure S1. Characterization of MUS:OT NPs. (a) Ratio between MUS:OT was calculated by <sup>1</sup>H-NMR (400 MHz, Bruker AVANCE 400). The ratio between MUS:OT was determined to be 24% OT and 76% MUS. (b) TEM image of AuNPs taken by Tecnai Osiris Size of the core was evaluated using a ImageJ plug-in analyzing more than 10000 particles. (c) The diameter of the core is  $3.5 \pm 1$  nm. MW can be estimated to be around 320kDa.

a)

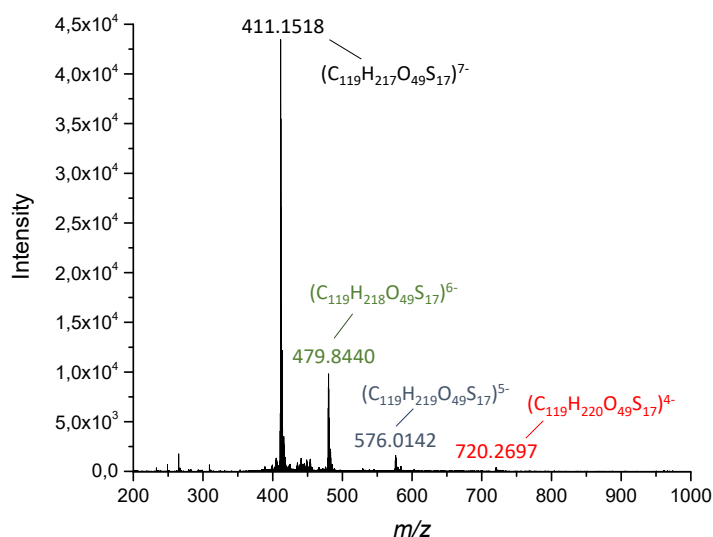

b)

| Molecular Formula                                                                  | Theoretical (Da) | Experimental (Da) | Error (ppm) |
|------------------------------------------------------------------------------------|------------------|-------------------|-------------|
| (C <sub>119</sub> H <sub>217</sub> O <sub>49</sub> S <sub>17</sub> ) <sup>7-</sup> | 411.1518         | 411.1523          | 1.6         |
| (C <sub>119</sub> H <sub>218</sub> O <sub>49</sub> S <sub>17</sub> ) <sup>6-</sup> | 479.8448         | 479.8440          | 1.7         |
| (C <sub>119</sub> H <sub>219</sub> O <sub>49</sub> S <sub>17</sub> ) <sup>5-</sup> | 576.0152         | 576.0142          | 1.9         |
| (C <sub>119</sub> H <sub>220</sub> O <sub>49</sub> S <sub>17</sub> ) <sup>4-</sup> | 720.2709         | 720.2697          | 1.6         |
| (C <sub>119</sub> H <sub>221</sub> O <sub>49</sub> S <sub>17</sub> ) <sup>3-</sup> | 960.6969         | 960.6948          | 2.2         |

c)

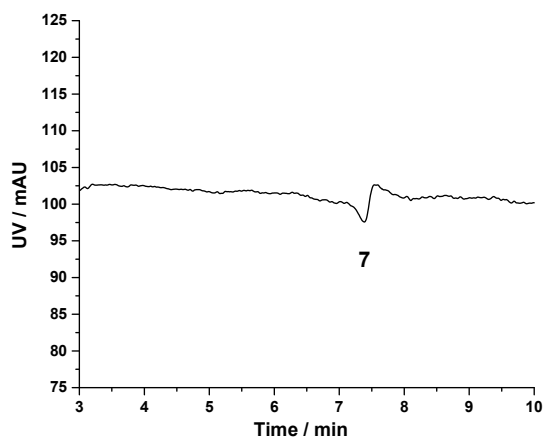

Figure S2. Characterization of MUS CD. (a) HRMS Cold-Spray Ionisation spectrum of MUS-CD in EtOH/H<sub>2</sub>O (50:50), (b) HRMS Summary of MUS-CD in EtOH/H<sub>2</sub>O (50:50). Values correspond to the monoisotopic mass, (c) CE-UV electropherogram of MUS-CD at 230 nm with assigned CD species showing 100% of 7 sulfonates per CD.

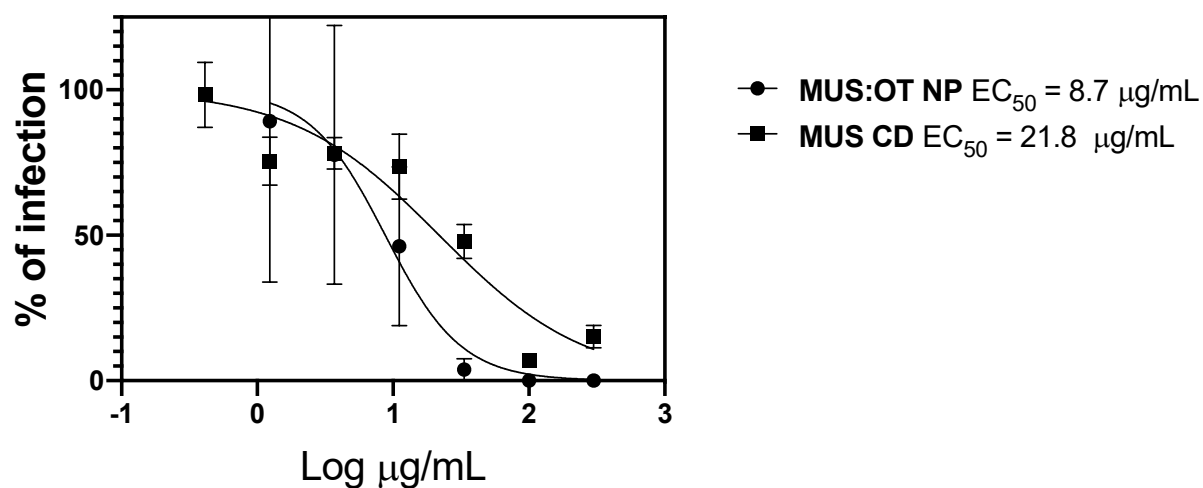

Figure S3. Inhibitory activity of sulfonated nanomaterial against SARS-CoV2. SARS-CoV-2 was incubated for 1h at 37°C with different doses of MUS:OT and MUS CD and subsequently serially added on cells. Number of plaques was determined 48hpi. Results are expressed as mean and SEM of two independent experiments.
